# Supplementary material for: Genomic profiling of cefotaxime-resistant Haemophilus influenzae from Norway and Sweden reveals extensive expansion of virulent multidrug-resistant international clones
Source: Front Microbiol. 2025 Jul 29;16:1601390. doi: 10.3389/fmicb.2025.1601390 (PMC12341455; doi:10.3389/fmicb.2025.1601390)
Supplement: Supplementary file 2 [file Data_Sheet_1.xlsx]

## Sheet: Ark1
ID	Alias	Accession (ENA)	PubMLST id	Included	Year	Month	Country	Region	County	Primary laboratory	Routine or surveillance testing	Age group	Gender	Care level	Suspected import (country)	Source	Life Identification Number (LIN)	PopPUNK strain	MLST (ST)	Serotype	Cluster (LIN9-based)	rPBP3 stage	rPBP3 group	PBP3 type	ftsI allele (PubMLST)	PBP3-ftsI	Identical LIN9 in the PubMLST database (Nov 29, 2024)	Identical LIN9-ftsI in the PubMLST database (Nov 29, 2024)	Resistance gene profile	aph(2'')-Ib (AF337947)	aac(6')-Im (AF337947)	catA2 (NG_047594)	tet(B) (NG_048163)	blaTEM-1B (AY458016)	blaTEM-1C (FJ560503)	mef(E) (U83667)	mel (AF274302)	tet(M) (X90939)	sul2 (HQ840942)	strA (AF321551)	strB (M28829)	aph(3')-Ia (X62115)	QRDR stage	GyrA S84	ParC S84	GyrA D88	ParC E88	MDR classification	Cefotaxime gradient MIC
001	Hi-001	GCA_923183295	26424	Yes	2007	1	Norway	South	Vestfold	Vestfold	Routine	5-9	Female	Primary care	No	Upper RT	0_1_0_2_5_0_0_2_1_0_0_0_0	13	1197	NTHi	Singleton	2	III(-)	1	342	1-342	Not investigated	Not investigated	1	.	.	.	.	100	.	.	.	.	.	.	.	.	0	.	.	.	.	MDR3	0.25
002	Hi-002	GCA_923262535	26425	Yes	2007	9	Norway	East	Akershus	Ahus	Routine	50-54	Female	Primary care	No	Upper RT	0_1_0_1_0_0_2_1_0_0_0_0_0	18	159	NTHi	Singleton	3	III(+)	5	343	5-343	No	No	0	.	.	.	.	.	.	.	.	.	.	.	.	.	0	.	.	.	.	MDR4	1
003	Hi-003	GCA_923262615	26426	Yes	2007	1	Norway	Capital	Oslo	Oslo	Surveillance	25-29	Female	Hospital outpatient	No	Upper RT	0_1_0_2_5_0_0_2_0_0_2_0_0	13	1197	NTHi	05	2	III(-)	1	342	1-342	Not investigated	Not investigated	0	.	.	.	.	.	.	.	.	.	.	.	.	.	0	.	.	.	.	MDR3	0.5
004	Hi-004	GCA_923263765	26427	Yes	2008	9	Norway	South	Vestfold	Vestfold	Routine	25-29	Female	Primary care	No	Upper RT	0_1_0_2_5_0_0_2_2_0_0_0_0	13	1197	NTHi	10	2	III(-)	1	342	1-342	Not investigated	Not investigated	0	.	.	.	.	.	.	.	.	.	.	.	.	.	0	.	.	.	.	MDR3	0.25
005	Hi-005	GCA_923267485	26428	Yes	2008	10	Norway	South	Vestfold	Vestfold	Routine	0-4	Male	Hospital inpatient	Egypt	Upper RT	0_1_0_2_5_0_0_2_2_0_0_1_0	13	1197	NTHi	10	2	III(-)	1	342	1-342	Not investigated	Not investigated	0	.	.	.	.	.	.	.	.	.	.	.	.	.	0	.	.	.	.	MDR4	0.25
006	Hi-006	GCA_923261185	26429	Yes	2008	11	Norway	South	Vestfold	Vestfold	Routine	0-4	Male	Primary care	No	Upper RT	0_1_0_2_5_0_0_2_2_0_0_0_0	13	1197	NTHi	10	2	III(-)	1	342	1-342	Not investigated	Not investigated	0	.	.	.	.	.	.	.	.	.	.	.	.	.	0	.	.	.	.	MDR4	0.25
007	Hi-007	GCA_923266105	26430	Yes	2008	11	Norway	South	Vestfold	Vestfold	Routine	0-4	Female	Primary care	No	Upper RT	0_1_0_2_5_0_0_2_2_0_0_0_0	13	1197	NTHi	10	2	III(-)	1	342	1-342	Not investigated	Not investigated	0	.	.	.	.	.	.	.	.	.	.	.	.	.	0	.	.	.	.	MDR4	0.5
008	Hi-008	GCA_923263715	26431	Yes	2009	3	Norway	East	Akershus	Ahus	Routine	45-49	Female	Primary care	No	Upper RT	0_0_0_7_4_0_1_0_5_0_0_0_0	37	408	NTHi	Singleton	3	III(+)	9	211	9-211	No	No	0	.	.	.	.	.	.	.	.	.	.	.	.	.	0	.	.	.	.	MDR3	1
009	Hi-009	GCA_923263605	26432	Yes	2009	5	Norway	West	Vestland	Førde	Routine	0-4	Female	Primary care	No	Ear	0_1_0_2_5_0_0_2_0_0_0_0_0	13	1197	NTHi	05	2	III(-)	1	342	1-342	Not investigated	Not investigated	0	.	.	.	.	.	.	.	.	.	.	.	.	.	0	.	.	.	.	MDR3	0.25
010	Hi-010	GCA_923261085	26433	Yes	2009	9	Norway	West	Vestland	Førde	Routine	50-54	Female	Primary care	No	Upper RT	0_1_0_2_5_0_0_2_0_0_0_0_0	13	1197	NTHi	05	2	III(-)	1	342	1-342	Not investigated	Not investigated	0	.	.	.	.	.	.	.	.	.	.	.	.	.	0	.	.	.	.	MDR3	0.25
011	Hi-011	GCA_923266095	26434	Yes	2009	12	Norway	West	Vestland	Førde	Routine	5-9	Male	Primary care	No	Ear	0_1_0_2_5_0_0_2_0_0_0_0_0	13	1197	NTHi	05	2	III(-)	1	342	1-342	Not investigated	Not investigated	0	.	.	.	.	.	.	.	.	.	.	.	.	.	0	.	.	.	.	MDR3	0.25
012	Hi-012	GCA_923259625	26435	Yes	2010	4	Norway	West	Vestland	Førde	Routine	0-4	Female	Primary care	No	Upper RT	0_1_0_2_5_0_0_2_0_0_0_0_0	13	1197	NTHi	05	2	III(-)	1	342	1-342	Not investigated	Not investigated	0	.	.	.	.	.	.	.	.	.	.	.	.	.	0	.	.	.	.	MDR3	0.25
013	Hi-013	GCA_923263615	26436	No (false R)	2012	12	Norway	South	Agder	Sørlandet	Surveillance	70-74	Male	Hospital inpatient	No	Blood	1_0_0_0_2_0_0_0_0_0_0_0_0	Novel2	1287	NTHi	Not performed	2	III(-)	7	344	7-344	Not investigated	Not investigated	0	.	.	.	.	.	.	.	.	.	.	.	.	.	0	.	.	.	.	Not classified	0.25
014	Hi-014	GCA_923261065	26437	Yes	2012	2	Norway	West	Vestland	Haukeland	Routine	75-79	Female	Hospital outpatient	No	Lower RT	0_0_0_10_2_0_0_0_21_1_0_0_0	20	160	NTHi	09	3	III(+)	2a	40	2a-40	No	No	0	.	.	.	.	.	.	.	.	.	.	.	.	.	0	.	.	.	.	MDR3	1
015	Hi-015	GCA_923265965	26438	Yes	2012	9	Norway	West	Rogaland	Stavanger	Routine	20-24	Female	Hospital outpatient	No	Sputum	0_0_0_6_0_0_0_1_8_0_0_0_0	11	148	NTHi	Singleton	3	III(+)	2a	345	2a-345	No	No	0	.	.	.	.	.	.	.	.	.	.	.	.	.	0	.	.	.	.	MDR3	0.5
016	Hi-016	GCA_923263585	26439	Yes	2012	9	Norway	South	Vestfold	Vestfold	Routine	0-4	Male	Primary care	No	Ear	40_0_0_0_0_0_0_10_0_0_0_0_0	1	124	Hif	19	3	III(+)	2a	40	2a-40	No	No	0	.	.	.	.	.	.	.	.	.	.	.	.	.	0	.	.	.	.	MDR3	2
017	Hi-017	GCA_923267435	26440	Yes	2013	4	Norway	West	Vestland	Haukeland	Routine	≥80	Female	Hospital inpatient	No	Eye	0_1_0_1_0_0_1_6_0_0_0_0_0	18	159	NTHi	18	3	III(+)	2b	67	2b-67	No	No	2	.	.	100	100	100	.	.	.	.	.	.	.	.	3	L	I	N	.	XDR7	2
018	Hi-018	GCA_923261075	26441	Yes	2013	4	Norway	West	Vestland	Haukeland	Routine	0-4	Female	Hospital outpatient	No	Upper RT	No data	18	159	NTHi	18	3	III(+)	2b	67	2b-67	Not applicable	Not applicable	2	.	.	100	100	100	.	.	.	.	.	.	.	.	3	L	I	N	.	XDR8	1
019	Hi-019	GCA_923261055	26442	Yes	2013	4	Norway	West	Vestland	Haukeland	Routine	30-34	Male	Hospital outpatient	No	Sputum	0_1_0_1_0_0_1_6_0_0_0_0_0	18	159	NTHi	18	3	III(+)	2b	67	2b-67	No	No	2	.	.	100	100	100	.	.	.	.	.	.	.	.	3	L	I	N	.	XDR8	1
020	Hi-020	GCA_923259215	26443	Yes	2013	6	Norway	North	Nordland	Stavanger	Routine	70-74	Male	Hospital inpatient	No	Sputum	0_0_0_6_0_1_0_9_28_0_0_0_0	11	836	NTHi	11	3	III(+)	2a	40	2a-40	No	No	1	.	.	.	.	100	.	.	.	.	.	.	.	.	0	.	.	.	.	MDR4	2
021	Hi-021	GCA_923261025	26444	Yes	2013	6	Norway	West	Rogaland	Stavanger	Routine	≥80	Female	Hospital inpatient	No	Sputum	0_0_0_6_0_1_0_9_28_0_0_0_0	11	836	NTHi	11	3	III(+)	2a	40	2a-40	No	No	1	.	.	.	.	100	.	.	.	.	.	.	.	.	0	.	.	.	.	MDR4	1
022	Hi-022	GCA_923256855	26445	Yes	2013	6	Norway	West	Rogaland	Stavanger	Routine	65-69	Male	Hospital inpatient	No	Sputum	0_0_0_6_0_1_0_9_28_0_0_1_0	11	836	NTHi	11	3	III(+)	2a	40	2a-40	No	No	1	.	.	.	.	100	.	.	.	.	.	.	.	.	0	.	.	.	.	MDR4	1
023	Hi-023	GCA_923266045	26446	Yes	2013	7	Norway	West	Rogaland	Stavanger	Routine	75-79	Male	Hospital inpatient	No	Upper RT	No data	11	836	NTHi	11	3	III(+)	2a	40	2a-40	Not applicable	Not applicable	1	.	.	.	.	100	.	.	.	.	.	.	.	.	0	.	.	.	.	MDR4	1
024	Hi-024	GCA_923265995	26447	Yes	2006	5	Norway	South	Vestfold	Vestfold	Routine	0-4	Male	Hospital inpatient	No	Upper RT	No data	23	155	NTHi	06	2	III-like(-)	4a	33	4a-33	Not investigated	Not investigated	0	.	.	.	.	.	.	.	.	.	.	.	.	.	0	.	.	.	.	MDR3	0.5
025	Hi-025	GCA_923287245	26448	Yes	2007	1	Norway	Capital	Oslo	Oslo	Surveillance	5-9	Female	Hospital outpatient	No	Upper RT	0_1_0_0_3_0_0_2_0_0_0_0_0	23	155	NTHi	06	2	III-like(-)	4a	33	4a-33	Not investigated	Not investigated	0	.	.	.	.	.	.	.	.	.	.	.	.	.	0	.	.	.	.	MDR3	0.5
026	Hi-026	GCA_923260715	26449	Yes	2007	2	Norway	Central	Trøndelag	Levanger	Surveillance	55-59	Female	Hospital inpatient	No	Lower RT	No data	23	155	NTHi	06	2	III-like(-)	4a	33	4a-33	Not investigated	Not investigated	0	.	.	.	.	.	.	.	.	.	.	.	.	.	0	.	.	.	.	MDR3	0.25
027	Hi-027	GCA_923260745	26450	Yes	2011	7	Norway	East	Akershus	Ahus	Routine	0-4	Male	Primary care	No	Eye	0_2_0_0_2_0_0_1_13_0_0_0_0	16	422	NTHi	27	3	III-like(+)	3a	26	3a-26	No	No	1	.	.	.	.	100	.	.	.	.	.	.	.	.	1	L	.	.	.	MDR5	1
028	Hi-028	GCA_923260985	26451	Yes	2011	3	Norway	South	Vestfold	Vestfold	Routine	35-39	Female	Primary care	No	Upper RT	0_0_0_2_2_0_0_0_2_0_0_0_0	25	142	NTHi	Singleton	3	III-like(+)	3a	107	3a-107	Yes	No	0	.	.	.	.	.	.	.	.	.	.	.	.	.	0	.	.	.	.	MDR3	1
029	Hi-029	GCA_923265985	26452	Yes	2013	4	Norway	West	Vestland	Haukeland	Routine	70-74	Male	Primary care	No	Sputum	0_1_0_1_0_0_1_5_0_0_0_0_0	18	1282	NTHi	Singleton	3	III-like(+)	3a	26	3a-26	No	No	2	.	.	100	100	100	.	.	.	.	.	.	.	.	0	.	.	.	.	MDR6	1
030	Hi-030	GCA_923266025	26453	Yes	2013	4	Norway	South	Vestfold	Vestre Viken	Routine	65-69	Male	Hospital inpatient	No	Upper RT	0_2_0_0_2_0_0_1_13_0_0_0_0	16	422	NTHi	27	3	III-like(+)	3a	26	3a-26	No	No	1	.	.	.	.	100	.	.	.	.	.	.	.	.	1	L	.	.	.	MDR6	1
031	Hi-031	Not applicable	31488	Reference	1954	No data	USA	No data	No data	Columbia	Reference	No data	No data	No data	Not applicable	No data	31_0_0_0_1_1_0_0_1_1_2_0_0	42	47	Hid	Not applicable	Reference	Reference	Reference	229	Ref-229	Not investigated	Not investigated	0	.	.	.	.	.	.	.	.	.	.	.	.	.	Reference	.	.	.	.	Not classified	No data
032	Hi-032	GCA_923259105	26454	Yes	2008	1	Norway	South	Vestfold	Vestfold	Routine	40-44	Female	Primary care	No	Upper RT	0_1_0_0_3_0_0_2_0_0_0_0_0	23	155	NTHi	06	2	III-like(-)	4a	33	4a-33	Not investigated	Not investigated	0	.	.	.	.	.	.	.	.	.	.	.	.	.	0	.	.	.	.	MDR1	0.25
033	Hi-033	GCA_923259185	26455	Yes	2009	3	Norway	South	Vestfold	Vestfold	Routine	45-49	Female	Primary care	No	Upper RT	0_1_0_2_5_0_0_2_0_0_0_0_0	13	1197	NTHi	05	2	III(-)	1	342	1-342	Not investigated	Not investigated	0	.	.	.	.	.	.	.	.	.	.	.	.	.	0	.	.	.	.	MDR3	0.25
034	Hi-034	GCA_923260685	26456	Yes	2011	5	Norway	East	Akershus	Ahus	Routine	70-74	Male	Hospital inpatient	No	Sputum	0_0_0_7_7_0_0_0_10_0_1_0_0	10	14	NTHi	13	1	II	X6	92	X6-92	Not investigated	Not investigated	0	.	.	.	.	.	.	.	.	.	.	.	.	.	0	.	.	.	.	MDR4	0.5
035	Hi-035	GCA_923259455	26457	Yes	2011	9	Norway	East	Innlandet	Innlandet	Routine	10-14	Female	Hospital outpatient	No	Ear	0_1_1_0_0_0_1_3_0_0_0_1_0	15	165	NTHi	Singleton	1	II	X1	89	X1-89	Not investigated	Not investigated	0	.	.	.	.	.	.	.	.	.	.	.	.	.	0	.	.	.	.	MDR5	0.25
036	Hi-036	GCA_923287235	26458	Yes	2011	12	Norway	South	Telemark	Vestfold	Routine	60-64	Female	Hospital outpatient	No	Sputum	0_0_0_7_7_0_0_0_10_0_0_0_0	10	14	NTHi	13	1	II	X7	1	X7-1	Not investigated	Not investigated	0	.	.	.	.	.	.	.	.	.	.	.	.	.	0	.	.	.	.	MDR4	0.25
037	Hi-037	GCA_923263195	26459	Yes	2012	1	Norway	Central	Trøndelag	St. Olav	Routine	≥80	Female	Hospital inpatient	No	Sputum	0_0_0_7_7_0_0_0_30_0_0_0_0	10	14	NTHi	Singleton	1	II	X2	1	X2-1	Not investigated	Not investigated	0	.	.	.	.	.	.	.	.	.	.	.	.	.	0	.	.	.	.	MDR2	0.25
038	Hi-038	GCA_923259425	26460	No (BMD no growth)	2012	2	Norway	Central	Trøndelag	St. Olav	Routine	50-54	Male	Hospital inpatient	No	Sputum	0_0_0_7_7_0_0_0_30_0_1_0_0	10	14	NTHi	Not performed	1	II	X2	1	X2-1	Not investigated	Not investigated	0	.	.	.	.	.	.	.	.	.	.	.	.	.	0	.	.	.	.	No data	0.25
039	Hi-039	GCA_923264695	26461	No (false R)	2012	4	Norway	East	Østfold	Østfold	Routine	75-79	Female	Hospital inpatient	No	Sputum	0_0_0_7_7_0_0_0_10_0_2_1_0	10	14	NTHi	Not performed	1	II	A	1	A-1	Not investigated	Not investigated	0	.	.	.	.	.	.	.	.	.	.	.	.	.	0	.	.	.	.	Not classified	0.25
040	Hi-040	GCA_923260965	26462	No (false R)	2012	5	Norway	Central	Trøndelag	St. Olav	Routine	0-4	Female	Hospital inpatient	No	Upper RT	0_1_1_0_0_0_1_3_0_0_0_0_0	15	165	NTHi	Not performed	1	II	X1	89	X1-89	Not investigated	Not investigated	0	.	.	.	.	.	.	.	.	.	.	.	.	.	0	.	.	.	.	Not classified	0.25
041	Hi-041	GCA_923259365	26463	No (false R)	2012	6	Norway	South	Vestfold	Vestfold	Routine	55-59	Female	Primary care	No	Upper RT	0_0_0_6_0_1_0_9_9_0_0_0_0	11	836	NTHi	Not performed	1	II	X1	346	X1-346	Not investigated	Not investigated	1	.	.	.	.	100	.	.	.	.	.	.	.	.	0	.	.	.	.	Not classified	0.25
042	Hi-042	GCA_923264595	26464	Yes	2012	7	Norway	Central	Trøndelag	St. Olav	Routine	65-69	Female	Hospital inpatient	No	Sputum	0_0_0_8_0_0_0_5_13_0_0_0_0	17	367	NTHi	Singleton	1	II	A	2	A-2	Not investigated	Not investigated	0	.	.	.	.	.	.	.	.	.	.	.	.	.	0	.	.	.	.	MDR4	0.25
043	Hi-043	GCA_923259065	26465	No (BMD no growth)	2013	3	Norway	East	Innlandet	Innlandet	Routine	60-64	Male	Primary care	No	Sputum	0_0_0_7_7_0_4_0_0_0_0_0_0	10	14	NTHi	Not performed	1	II	X4	347	X4-347	Not investigated	Not investigated	0	.	.	.	.	.	.	.	.	.	.	.	.	.	0	.	.	.	.	No data	0.5
044	Hi-044	GCA_923264645	26466	Yes	2013	4	Norway	South	Telemark	Vestfold	Routine	70-74	Male	Hospital outpatient	No	Lower RT	0_0_0_7_7_0_0_0_10_8_0_2_0	10	1034	NTHi	13	1	II	A	1	A-1	Not investigated	Not investigated	0	.	.	.	.	.	.	.	.	.	.	.	.	.	0	.	.	.	.	MDR6	0.25
046	Hi-046	GCA_923259025	26467	No (false R)	2013	5	Norway	South	Vestfold	Vestfold	Routine	55-59	Female	Hospital outpatient	No	Lower RT	0_0_0_6_0_1_0_9_9_0_0_0_0	11	836	NTHi	Not performed	1	II	X1	346	X1-346	Not investigated	Not investigated	1	.	.	.	.	100	.	.	.	.	.	.	.	.	0	.	.	.	.	Not classified	0.25
047	Hi-047	GCA_923260545	26468	Yes	2013	8	Norway	South	Vestfold	Vestfold	Routine	65-69	Female	Hospital outpatient	No	Lower RT	0_1_0_1_1_0_0_12_3_0_0_0_0	7	2341	NTHi	Singleton	1	II	D	43	D-43	Not investigated	Not investigated	0	.	.	.	.	.	.	.	.	.	.	.	.	.	0	.	.	.	.	MDR4	0.25
048	Hi-048	GCA_923258995	26469	Yes	2013	8	Norway	East	Akershus	Ahus	Routine	60-64	Male	Hospital inpatient	No	Lower RT	0_1_0_0_0_0_0_1_0_0_0_0_0	67	1281	NTHi	Singleton	3	III-like(+)	3a	26	3a-26	No	No	0	.	.	.	.	.	.	.	.	.	.	.	.	.	3	L	I	G	.	MDR6	1
049	Hi-049	GCA_923263045	26470	Yes	2013	8	Norway	East	Østfold	Østfold	Routine	50-54	Male	Hospital outpatient	Vietnam	Lower RT	0_0_0_7_0_0_0_1_3_0_0_0_0	21	3	NTHi	Singleton	3	III-like(+)	3a	26	3a-26	No	No	9	.	.	100	100	100	.	.	.	.	100	100	100	100	0	.	.	.	.	MDR6	1
050	Hi-050	GCA_923263065	26471	Yes	2013	9	Norway	Central	Trøndelag	Levanger	Routine	0-4	Female	Primary care	No	Ear	0_0_0_4_0_0_0_0_6_0_0_0_0	64	697	NTHi	Singleton	2	III(-)	19	68	19-68	Not investigated	Not investigated	0	.	.	.	.	.	.	.	.	.	.	.	.	.	0	.	.	.	.	MDR3	1
051	Hi-051	GCA_923258965	26472	Yes	2013	10	Norway	Central	Trøndelag	Levanger	Routine	70-74	Male	Hospital inpatient	No	Sputum	0_1_0_1_1_0_0_12_6_0_0_0_0	7	201	NTHi	Singleton	1	II	X9	348	X9-348	Not investigated	Not investigated	0	.	.	.	.	.	.	.	.	.	.	.	.	.	0	.	.	.	.	MDR4	0.25
052	Hi-052	GCA_923264535	26473	Yes	2013	11	Norway	South	Vestfold	Vestfold	Routine	5-9	Male	Hospital inpatient	No	Upper RT	0_4_0_8_0_1_1_2_0_0_1_0_0	Novel1	264	NTHi	21	3	III(+)	2a	40	2a-40	No	No	0	.	.	.	.	.	.	.	.	.	.	.	.	.	0	.	.	.	.	MDR3	0.5
053	Hi-053	GCA_923263005	26474	Yes	2013	12	Sweden	Sweden	Kalmar	Kalmar	Routine	60-64	Female	Primary care	Spain/Canary islands	Upper RT	0_1_2_0_0_0_0_3_24_0_0_0_0	22	156	NTHi	Singleton	3	III(+)	2b	218	2b-218	No	No	0	.	.	.	.	.	.	.	.	.	.	.	.	.	0	.	.	.	.	MDR4	2
054	Hi-054	GCA_923258945	26475	Yes	2013	12	Norway	South	Vestfold	Vestfold	Routine	0-4	Female	Primary care	No	Upper RT	40_0_0_0_0_0_0_10_0_0_0_1_0	1	124	Hif	19	3	III(+)	2a	40	2a-40	No	No	0	.	.	.	.	.	.	.	.	.	.	.	.	.	0	.	.	.	.	MDR3	2
055	Hi-055	GCA_923260885	26476	No (false R)	2014	2	Norway	South	Telemark	Vestfold	Surveillance	0-4	Male	Hospital inpatient	No	Eye	0_1_0_2_5_1_1_1_0_0_0_0_0	13	265	NTHi	Not performed	1	II	X3	151	X3-151	Not investigated	Not investigated	0	.	.	.	.	.	.	.	.	.	.	.	.	.	0	.	.	.	.	Not classified	0.25
056	Hi-056	GCA_923260415	26477	Yes	2014	2	Norway	Capital	Oslo	Ahus	Surveillance	70-74	Male	Hospital inpatient	No	Upper RT	0_1_0_1_1_0_0_3_19_0_0_0_0	7	2385	NTHi	04	3	III(+)	2a	40	2a-40	No	No	0	.	.	.	.	.	.	.	.	.	.	.	.	.	0	.	.	.	.	MDR4	2
057	Hi-057	GCA_923258875	26478	Yes	2013	12	Norway	Capital	Oslo	Fürst	Routine	0-4	Male	Primary care	No	Upper RT	0_1_0_1_1_0_0_3_19_0_0_0_0	7	107	NTHi	04	3	III(+)	2a	40	2a-40	No	No	0	.	.	.	.	.	.	.	.	.	.	.	.	.	0	.	.	.	.	MDR4	2
058	Hi-058	GCA_923265855	26479	Yes	2014	2	Norway	East	Innlandet	Innlandet	Routine	75-79	Female	Primary care	No	Upper RT	0_1_0_0_3_0_0_2_0_0_0_1_0	23	155	NTHi	06	2	III-like(-)	4a	33	4a-33	Not investigated	Not investigated	0	.	.	.	.	.	.	.	.	.	.	.	.	.	0	.	.	.	.	MDR3	0.25
059	Hi-059	GCA_923287255	26480	Yes	2014	2	Norway	East	Akershus	Ahus	Routine	35-39	Female	Primary care	No	Upper RT	0_1_0_1_1_0_0_3_19_0_0_0_0	7	107	NTHi	04	3	III(+)	2a	40	2a-40	No	No	0	.	.	.	.	.	.	.	.	.	.	.	.	.	0	.	.	.	.	MDR4	1
060	Hi-060	GCA_923266935	26481	Yes	2014	3	Norway	Central	Møre og Romsdal	Molde	Routine	65-69	Female	Primary care	Thailand, Laos, Cambodia	Upper RT	0_1_0_1_0_0_1_7_0_0_0_0_0	18	159	NTHi	Singleton	3	III-like(+)	3a	26	3a-26	No	No	2	.	.	100	100	100	.	.	.	.	.	.	.	.	0	.	.	.	.	XDR7	1
061	Hi-061	GCA_923266965	26482	Yes	2014	3	Norway	Capital	Oslo	Oslo	Surveillance	40-44	Male	Hospital inpatient	No	Upper RT	0_1_0_1_1_0_0_3_19_0_0_0_0	7	2385	NTHi	04	3	III(+)	2a	40	2a-40	No	No	0	.	.	.	.	.	.	.	.	.	.	.	.	.	0	.	.	.	.	MDR4	2
062	Hi-062	GCA_923268005	26483	Yes	2014	4	Norway	South	Vestfold	Vestre Viken	Routine	35-39	Female	Hospital inpatient	No	Upper RT	0_0_0_3_2_0_0_2_5_0_0_0_0	14	145	NTHi	Singleton	1	Misc	Misc1	349	Mi1-349	Not investigated	Not investigated	0	.	.	.	.	.	.	.	.	.	.	.	.	.	0	.	.	.	.	MDR3	0.25
063	Hi-063	GCA_923264365	26484	Yes	2014	4	Norway	East	Akershus	Ahus	Routine	≥80	Female	Hospital inpatient	No	Sputum	0_2_0_0_2_0_0_1_7_0_0_1_0	16	422	NTHi	02	3	III-like(+)	3a	26	3a-26	Yes	Yes	0	.	.	.	.	.	.	.	.	.	.	.	.	.	0	.	.	.	.	MDR4	1
064	Hi-064	GCA_923260405	26485	Yes	2014	6	Norway	East	Innlandet	Innlandet	Routine	0-4	Male	Hospital inpatient	No	Eye	0_0_0_6_0_1_0_9_6_0_0_0_0	11	836	NTHi	17	2	III-like(-)	4b	33	4b-33	Not investigated	Not investigated	1	.	.	.	.	100	.	.	.	.	.	.	.	.	0	.	.	.	.	MDR3	0.25
065	Hi-065	GCA_923267915	26486	No (false R)	2014	7	Norway	South	Vestfold	Vestfold	Routine	75-79	Female	Hospital inpatient	No	Lower RT	0_1_1_0_0_0_1_3_1_0_0_0_0	15	165	NTHi	Not performed	1	II	X13	89	X13-89	Not investigated	Not investigated	0	.	.	.	.	.	.	.	.	.	.	.	.	.	0	.	.	.	.	Not classified	0.25
066	Hi-066	GCA_923257355	26487	No (false R)	2014	8	Norway	Capital	Oslo	Oslo	Routine	5-9	Female	Hospital inpatient	No	Trachea	0_0_0_6_0_1_0_9_9_2_0_0_0	11	836	NTHi	Not performed	1	II	X1	346	X1-346	Not investigated	Not investigated	1	.	.	.	.	100	.	.	.	.	.	.	.	.	0	.	.	.	.	Not classified	0.25
067	Hi-067	GCA_923267985	26488	Yes	2014	8	Norway	Central	Trøndelag	Levanger	Routine	75-79	Male	Hospital inpatient	No	Sputum	0_0_0_3_2_0_1_0_5_0_0_0_0	14	11	NTHi	16	3	III-like(+)	3a	26	3a-26	No	No	0	.	.	.	.	.	.	.	.	.	.	.	.	.	0	.	.	.	.	MDR4	2
068	Hi-068	GCA_923266915	26489	Yes	2014	8	Norway	East	Innlandet	Innlandet	Routine	55-59	Male	Hospital inpatient	No	Upper RT	0_0_0_10_2_0_0_0_25_0_0_0_0	20	160	NTHi	24	3	III-like(+)	3b	26	3b-26	No	No	1	.	.	.	.	100	.	.	.	.	.	.	.	.	0	.	.	.	.	MDR4	2
069	Hi-069	GCA_923264285	26490	No (false R)	2014	9	Norway	South	Telemark	Vestfold	Routine	10-14	Female	Hospital inpatient	No	Sputum	0_0_0_7_7_0_0_0_10_0_1_0_0	10	14	NTHi	Not performed	1	II	A	1	A-1	Not investigated	Not investigated	0	.	.	.	.	.	.	.	.	.	.	.	.	.	0	.	.	.	.	Not classified	0.25
070	Hi-070	GCA_923260185	26491	Yes	2014	10	Norway	East	Akershus	Ahus	Routine	0-4	Male	Primary care	No	Ear	1_0_0_6_0_0_4_0_0_0_0_0_0	34	535	NTHi	20	3	III(+)	9	211	9-211	No	No	0	.	.	.	.	.	.	.	.	.	.	.	.	.	0	.	.	.	.	MDR3	0.25
071	Hi-071	GCA_923257265	26492	No (false R)	2014	11	Norway	South	Vestfold	Vestfold	Routine	10-14	Male	Hospital outpatient	No	Upper RT	0_0_0_7_7_0_0_0_13_0_0_2_0	10	1034	NTHi	Not performed	1	II	A	1	A-1	Not investigated	Not investigated	0	.	.	.	.	.	.	.	.	.	.	.	.	.	0	.	.	.	.	Not classified	0.25
072	Hi-072	GCA_923258785	26493	Yes	2014	12	Norway	East	Akershus	Vestre Viken	Routine	≥80	Female	Hospital inpatient	No	Sputum	0_0_0_5_2_0_0_1_0_0_0_0_0	95	1	NTHi	03	3	III(+)	8	19	8-19	Yes	Yes	0	.	.	.	.	.	.	.	.	.	.	.	.	.	2	L	I	.	.	MDR5	0.5
073	Hi-073	GCA_923267895	26494	Yes	2014	12	Norway	East	Akershus	Fürst	Routine	55-59	Female	Primary care	No	Upper RT	0_1_0_1_1_0_0_3_33_0_0_0_0	7	107	NTHi	14	3	III(+)	8	22	8-22	No	No	0	.	.	.	.	.	.	.	.	.	.	.	.	.	0	.	.	.	.	MDR4	0.5
074	Hi-074	GCA_923266355	26495	Yes	2015	1	Norway	East	Akershus	Fürst	Routine	≥80	Female	Primary care	No	Upper RT	1_0_0_6_0_0_4_0_0_0_1_0_0	34	535	NTHi	20	3	III(+)	9	211	9-211	No	No	0	.	.	.	.	.	.	.	.	.	.	.	.	.	0	.	.	.	.	MDR4	1
075	Hi-075	GCA_923264265	26496	Yes	2014	12	Norway	East	Akershus	Fürst	Routine	50-54	Female	Primary care	No	Upper RT	0_1_0_1_1_0_0_9_0_0_0_0_0	7	1002	NTHi	Singleton	3	III-like(+)	3a	26	3a-26	Yes	Yes	0	.	.	.	.	.	.	.	.	.	.	.	.	.	0	.	.	.	.	MDR4	2
076	Hi-076	GCA_923264295	26497	Yes	2015	1	Norway	Capital	Oslo	Fürst	Routine	5-9	Female	Primary care	No	Upper RT	0_2_0_0_2_0_0_1_7_0_0_1_0	16	422	NTHi	02	3	III-like(+)	3a	26	3a-26	Yes	Yes	0	.	.	.	.	.	.	.	.	.	.	.	.	.	0	.	.	.	.	MDR4	2
077	Hi-077	GCA_923264235	26498	Yes	2015	1	Norway	South	Vestfold	Vestfold	Routine	0-4	Male	Primary care	No	Upper RT	0_4_0_8_0_1_1_2_0_0_0_0_0	Novel1	264	NTHi	21	3	III(+)	2a	40	2a-40	No	No	0	.	.	.	.	.	.	.	.	.	.	.	.	.	0	.	.	.	.	MDR3	0.5
078	Hi-078	GCA_923262845	26499	No (false R)	2015	1	Norway	South	Vestfold	Vestfold	Routine	65-69	Male	Hospital inpatient	No	Lower RT	0_0_0_7_7_0_0_0_10_0_6_0_0	10	14	NTHi	Not performed	1	II	A	1	A-1	Not investigated	Not investigated	0	.	.	.	.	.	.	.	.	.	.	.	.	.	0	.	.	.	.	Not classified	0.25
079	Hi-079	GCA_923262795	26500	Yes	2015	1	Norway	Capital	Oslo	Fürst	Routine	40-44	Male	Primary care	No	Upper RT	0_2_0_0_2_0_0_1_7_0_0_5_0	16	422	NTHi	02	3	III-like(+)	3a	26	3a-26	Yes	Yes	0	.	.	.	.	.	.	.	.	.	.	.	.	.	0	.	.	.	.	MDR4	1
080	Hi-080	GCA_923267795	26501	Yes	2015	1	Norway	Capital	Oslo	Fürst	Routine	10-14	Female	Primary care	No	Upper RT	0_0_0_5_2_0_0_1_0_4_0_0_0	95	1	NTHi	03	3	III(+)	8	19	8-19	Yes	Yes	0	.	.	.	.	.	.	.	.	.	.	.	.	.	2	L	I	.	.	MDR5	0.5
081	Hi-081	GCA_923264195	26502	Yes	2015	2	Norway	West	Rogaland	Haugesund	Routine	0-4	Female	Hospital inpatient	No	Eye	0_0_0_7_3_0_0_1_0_0_0_0_0	5	586	NTHi	22	3	III(+)	2a	40	2a-40	No	No	0	.	.	.	.	.	.	.	.	.	.	.	.	.	0	.	.	.	.	MDR3	2
082	Hi-082	GCA_923267785	26503	Yes	2015	1	Norway	Capital	Oslo	Fürst	Routine	5-9	Male	Primary care	No	Upper RT	0_2_0_0_2_0_0_1_7_0_0_6_0	16	422	NTHi	02	3	III-like(+)	3a	26	3a-26	Yes	Yes	0	.	.	.	.	.	.	.	.	.	.	.	.	.	0	.	.	.	.	MDR4	2
083	Hi-083	GCA_923266895	26504	Yes	2015	2	Norway	East	Innlandet	Innlandet	Routine	10-14	Male	Hospital inpatient	No	Upper RT	0_1_0_1_1_0_0_3_19_0_0_0_0	7	2385	NTHi	04	3	III(+)	2a	40	2a-40	No	No	0	.	.	.	.	.	.	.	.	.	.	.	.	.	0	.	.	.	.	MDR4	2
084	Hi-084	GCA_923267685	26505	Yes	2015	2	Norway	Capital	Oslo	Fürst	Routine	45-49	Female	Primary care	No	Upper RT	0_0_0_5_2_0_0_1_0_4_0_1_0	95	1	NTHi	03	3	III(+)	8	19	8-19	Yes	Yes	0	.	.	.	.	.	.	.	.	.	.	.	.	.	2	L	I	.	.	MDR5	1
086	Hi-086	GCA_923259925	26507	Yes	2015	2	Norway	Capital	Oslo	Fürst	Routine	60-64	Female	Primary care	No	Upper RT	0_2_0_0_2_0_0_1_7_0_0_4_0	16	422	NTHi	02	3	III-like(+)	3a	26	3a-26	Yes	Yes	0	.	.	.	.	.	.	.	.	.	.	.	.	.	0	.	.	.	.	MDR4	1
088	Hi-088	GCA_923263885	26509	Yes	2015	3	Norway	Capital	Oslo	Fürst	Routine	25-29	Female	Primary care	No	Upper RT	0_1_0_1_1_0_0_3_33_0_0_0_0	7	107	NTHi	14	3	III(+)	8	22	8-22	No	No	0	.	.	.	.	.	.	.	.	.	.	.	.	.	0	.	.	.	.	MDR4	0.5
089	Hi-089	GCA_923267575	26510	Yes	2015	3	Norway	South	Vestfold	Vestfold	Routine	70-74	Male	Hospital inpatient	No	Upper RT	0_1_0_1_1_0_0_3_23_0_0_0_0	7	107	NTHi	Singleton	3	III(+)	8	22	8-22	No	No	0	.	.	.	.	.	.	.	.	.	.	.	.	.	0	.	.	.	.	MDR4	1
090	Hi-090	GCA_923266325	26511	Yes	2015	3	Norway	East	Akershus	Fürst	Routine	25-29	Male	Primary care	No	Upper RT	0_1_0_1_1_0_0_3_33_0_0_0_0	7	107	NTHi	14	3	III(+)	8	22	8-22	No	No	0	.	.	.	.	.	.	.	.	.	.	.	.	.	0	.	.	.	.	MDR4	0.5
091	Hi-091	GCA_923260735	26512	Yes	2015	4	Norway	Capital	Oslo	Fürst	Routine	20-24	Female	Primary care	No	Upper RT	0_0_0_10_2_0_0_0_25_1_0_0_0	20	160	NTHi	24	3	III-like(+)	3b	26	3b-26	No	No	1	.	.	.	.	100	.	.	.	.	.	.	.	.	0	.	.	.	.	MDR4	4
092	Hi-092	GCA_923267535	26513	Yes	2015	4	Norway	Central	Trøndelag	Levanger	Routine	70-74	Male	Hospital inpatient	No	Sputum	0_1_0_1_1_0_0_0_3_0_0_0_0	7	1568	NTHi	Singleton	3	III(+)	12	146	12-146	No	No	8	.	.	.	.	100	.	100	100	99.64	.	.	.	.	1	L	.	.	.	MDR5	1
093	Hi-093	GCA_923267235	26514	Yes	2015	4	Norway	East	Akershus	Fürst	Routine	60-64	Male	Primary care	No	Upper RT	0_0_0_3_2_0_1_1_0_0_0_0_0	14	11	NTHi	Singleton	3	III-like(+)	17	350	17-350	No	No	0	.	.	.	.	.	.	.	.	.	.	.	.	.	0	.	.	.	.	MDR4	2
094	Hi-094	GCA_923282625	26515	Yes	2015	4	Norway	East	Akershus	Fürst	Routine	40-44	Female	Primary care	Japan	Upper RT	0_2_0_0_2_0_0_1_0_0_0_0_0	16	422	NTHi	Singleton	1	Misc	Misc2	148	Mi2-148	Not investigated	Not investigated	5	.	.	.	.	.	100	.	.	.	.	.	.	.	1	L	.	.	.	MDR5	0.25
095	Hi-095	GCA_923277045	26516	Yes	2015	5	Sweden	Sweden	Örebro	Ørebro	Routine	30-34	Male	Primary care	No	Upper RT	0_2_4_0_2_0_0_14_0_0_0_0_0	9	57	NTHi	26	3	III-like(+)	3a	26	3a-26	No	No	0	.	.	.	.	.	.	.	.	.	.	.	.	.	0	.	.	.	.	MDR4	2
096	Hi-096	GCA_923279355	26517	Yes	2015	5	Norway	West	Vestland	Haukeland	Routine	65-69	Male	Primary care	No	Upper RT	0_2_4_0_2_0_0_16_0_0_0_0_0	9	57	NTHi	Singleton	3	III-like(+)	16a	85	16a-85	No	No	6	.	.	.	.	100	.	.	.	.	.	.	.	99.88	0	.	.	.	.	MDR4	2
097	Hi-097	GCA_923282165	26518	Yes	2015	6	Norway	Capital	Oslo	Fürst	Routine	30-34	Female	Primary care	No	Upper RT	0_2_0_0_2_0_0_1_9_0_0_0_0	16	422	NTHi	Singleton	3	III(+)	2b	351	2b-351	No	No	0	.	.	.	.	.	.	.	.	.	.	.	.	.	0	.	.	.	.	MDR4	1
098	Hi-098	GCA_923282185	26519	Yes	2015	6	Norway	West	Rogaland	Stavanger	Routine	0-4	Female	Primary care	No	Ear	0_1_0_1_1_0_0_3_18_0_0_0_0	7	107	NTHi	Singleton	3	III(+)	2a	40	2a-40	Yes	Yes	0	.	.	.	.	.	.	.	.	.	.	.	.	.	0	.	.	.	.	MDR4	1
099	Hi-099	GCA_923277775	26520	Yes	2015	6	Norway	Central	Trøndelag	Levanger	Routine	75-79	Male	Hospital inpatient	No	Sputum	0_0_0_5_2_0_0_1_0_7_0_0_0	95	1	NTHi	03	3	III(+)	8	19	8-19	Yes	Yes	0	.	.	.	.	.	.	.	.	.	.	.	.	.	2	L	I	.	.	MDR5	1
100	Hi-100	GCA_923286085	26521	Yes	2015	6	Norway	Capital	Oslo	Fürst	Routine	35-39	Female	Primary care	No	Upper RT	0_0_0_7_5_0_0_0_14_0_0_0_0	54	183	NTHi	01	3	III-like(+)	3b	352	3b-352	No	No	0	.	.	.	.	.	.	.	.	.	.	.	.	.	0	.	.	.	.	MDR3	2
101	Hi-101	GCA_923285595	26522	Yes	2015	7	Norway	East	Akershus	Fürst	Routine	75-79	Male	Primary care	No	Upper RT	0_1_0_1_1_0_0_3_19_1_0_0_0	7	2385	NTHi	04	3	III(+)	2a	40	2a-40	No	No	0	.	.	.	.	.	.	.	.	.	.	.	.	.	0	.	.	.	.	MDR4	1
103	Hi-103	GCA_923276425	26524	Yes	2015	7	Sweden	Sweden	Kalmar	Kalmar	Routine	40-44	Male	Hospital inpatient	No	Sputum	66_0_0_0_0_0_0_0_0_0_0_0_0	Novel3	1618	NTHi	Singleton	3	III(+)	2b	40	2b-40	No	No	0	.	.	.	.	.	.	.	.	.	.	.	.	.	0	.	.	.	.	MDR3	2
104	Hi-104	GCA_923277655	26525	Yes	2015	9	Norway	Capital	Oslo	Fürst	Routine	15-19	Male	Primary care	No	Upper RT	0_1_0_2_3_0_0_1_0_1_2_0_0	66	196	NTHi	07	3	III(+)	2b	218	2b-218	Yes	No	0	.	.	.	.	.	.	.	.	.	.	.	.	.	0	.	.	.	.	MDR3	2
105	Hi-105	GCA_923276835	26526	Yes	2015	9	Norway	Capital	Oslo	Fürst	Routine	60-64	Male	Primary care	No	Upper RT	0_0_0_2_2_0_0_0_3_0_6_0_0	25	142	NTHi	Singleton	3	III-like(+)	3a	26	3a-26	Yes	Yes	0	.	.	.	.	.	.	.	.	.	.	.	.	.	0	.	.	.	.	MDR3	1
106	Hi-106	GCA_923277615	26527	Yes	2015	11	Norway	East	Innlandet	Ahus	Routine	70-74	Male	Hospital inpatient	No	Sputum	0_0_0_7_7_0_0_12_0_0_0_0_0	10	14	NTHi	Singleton	1	II	X12	254	X12-254	Not investigated	Not investigated	0	.	.	.	.	.	.	.	.	.	.	.	.	.	0	.	.	.	.	MDR3	0.25
107	Hi-107	GCA_923276585	26528	Yes	2015	10	Norway	East	Innlandet	Innlandet	Routine	55-59	Male	Hospital inpatient	No	Upper RT	0_0_0_3_1_1_0_0_0_39_0_0_0	6	103	NTHi	23	3	III-like(+)	3a	26	3a-26	Yes	Yes	1	.	.	.	.	100	.	.	.	.	.	.	.	.	0	.	.	.	.	MDR4	1
108	Hi-108	GCA_923287115	26529	Yes	2015	11	Norway	Capital	Oslo	Ahus	Routine	70-74	Female	Hospital inpatient	No	Lower RT	0_0_0_7_3_0_1_0_0_0_0_0_0	5	2342	NTHi	Singleton	2	III(-)	20	306	20-306	Not investigated	Not investigated	0	.	.	.	.	.	.	.	.	.	.	.	.	.	2	L	R	.	.	MDR5	0.25
109	Hi-109	GCA_923276825	26530	No (false R)	2015	12	Norway	East	Akershus	Ahus	Routine	≥80	Male	Hospital inpatient	No	Lower RT	0_0_0_7_7_0_0_0_10_17_0_0_0	10	1034	NTHi	Not performed	1	II	A	1	A-1	Not investigated	Not investigated	0	.	.	.	.	.	.	.	.	.	.	.	.	.	0	.	.	.	.	Not classified	0.25
110	Hi-110	GCA_923277095	26531	Yes	2015	12	Norway	Capital	Oslo	Fürst	Routine	15-19	Female	Primary care	No	Upper RT	0_0_0_7_5_0_0_0_14_0_5_0_0	54	183	NTHi	01	3	III-like(+)	3b	352	3b-352	No	No	0	.	.	.	.	.	.	.	.	.	.	.	.	.	0	.	.	.	.	MDR3	1
111	Hi-111	GCA_923277575	26532	Yes	2016	1	Norway	Capital	Oslo	Fürst	Routine	30-34	Female	Primary care	No	Upper RT	0_0_0_5_2_0_0_1_1_0_0_0_0	95	1	NTHi	Singleton	3	III(+)	8	19	8-19	No	No	0	.	.	.	.	.	.	.	.	.	.	.	.	.	2	L	I	.	.	MDR5	0.5
112	Hi-112	GCA_923276535	26533	Yes	2016	1	Norway	Capital	Oslo	Fürst	Routine	5-9	Male	Primary care	No	Upper RT	0_0_0_7_5_0_0_0_14_0_1_0_0	54	183	NTHi	01	3	III-like(+)	3b	352	3b-352	No	No	0	.	.	.	.	.	.	.	.	.	.	.	.	.	0	.	.	.	.	MDR3	2
113	Hi-113	GCA_923277595	26534	Yes	2016	3	Norway	South	Vestfold	Vestfold	Routine	≥80	Female	Hospital inpatient	No	Sputum	0_1_0_2_3_0_0_1_0_1_2_0_0	66	196	NTHi	07	3	III(+)	2b	218	2b-218	Yes	No	0	.	.	.	.	.	.	.	.	.	.	.	.	.	0	.	.	.	.	MDR3	2
114	Hi-114	GCA_923276625	26535	Yes	2016	3	Norway	East	Akershus	Fürst	Routine	50-54	Female	Primary care	No	Upper RT	0_0_0_7_5_0_0_0_14_0_3_4_0	54	183	NTHi	01	3	III-like(+)	3b	352	3b-352	No	No	0	.	.	.	.	.	.	.	.	.	.	.	.	.	0	.	.	.	.	MDR3	2
115	Hi-115	GCA_923277405	26536	Yes	2016	4	Norway	West	Vestland	Haukeland	Routine	60-64	Male	Primary care	No	Sputum	0_0_0_7_3_0_0_1_0_0_1_0_0	5	586	NTHi	22	3	III(+)	2a	40	2a-40	No	No	0	.	.	.	.	.	.	.	.	.	.	.	.	.	0	.	.	.	.	MDR3	1
116	Hi-116	GCA_923276435	26537	Yes	2016	4	Norway	South	Buskerud	Vestre Viken	Routine	0-4	Female	Hospital inpatient	No	Upper RT	0_1_0_2_3_0_0_1_0_1_2_0_0	66	196	NTHi	07	3	III(+)	2b	218	2b-218	Yes	No	0	.	.	.	.	.	.	.	.	.	.	.	.	.	0	.	.	.	.	MDR3	2
117	Hi-117	GCA_923276745	26538	Yes	2016	4	Norway	West	Vestland	Haukeland	Routine	50-54	Male	Hospital outpatient	No	Sputum	0_0_0_6_0_1_0_9_6_1_0_1_0	11	2386	NTHi	17	2	III-like(-)	4b	33	4b-33	Not investigated	Not investigated	1	.	.	.	.	100	.	.	.	.	.	.	.	.	0	.	.	.	.	MDR3	0.25
118	Hi-118	GCA_923284145	26539	Yes	2016	4	Sweden	Sweden	Kalmar	Kalmar	Routine	15-19	Female	Hospital outpatient	No	Sputum	0_0_0_5_2_0_0_1_0_2_0_0_0	95	1	NTHi	03	3	III(+)	8	19	8-19	Yes	Yes	0	.	.	.	.	.	.	.	.	.	.	.	.	.	2	L	I	.	.	MDR5	1
119	Hi-119	GCA_923304285	26540	Yes	2016	5	Norway	Capital	Oslo	Oslo	Routine	70-74	Female	Primary care	No	Upper RT	0_0_0_6_0_1_0_9_30_1_0_0_0	11	836	NTHi	25	3	III-like(+)	3b	26	3b-26	No	No	1	.	.	.	.	100	.	.	.	.	.	.	.	.	0	.	.	.	.	MDR4	2
120	Hi-120	GCA_923276895	26541	Yes	2016	5	Sweden	Sweden	Västra Götaland	Sahlgrenska	Routine	25-29	Female	Hospital inpatient	No	Trachea	0_2_4_0_2_0_0_14_0_0_1_0_0	9	57	NTHi	26	3	III-like(+)	3a	26	3a-26	No	No	0	.	.	.	.	.	.	.	.	.	.	.	.	.	0	.	.	.	.	MDR4	2
121	Hi-121	GCA_923276855	26542	Yes	2016	5	Norway	South	Vestfold	Vestfold	Routine	0-4	Female	Hospital inpatient	No	Upper RT	0_1_0_2_3_0_0_1_0_1_2_0_0	66	196	NTHi	07	3	III(+)	2b	218	2b-218	Yes	No	0	.	.	.	.	.	.	.	.	.	.	.	.	.	0	.	.	.	.	MDR3	2
122	Hi-122	GCA_923276875	26543	Yes	2016	6	Norway	Capital	Oslo	Fürst	Routine	30-34	Female	Primary care	No	Upper RT	0_0_0_0_6_0_0_0_7_2_0_1_0	26	143	NTHi	08	3	III-like(+)	3a	107	3a-107	Yes	Yes	3	99.89	100	100	.	100	.	100	100	.	.	.	.	.	0	.	.	.	.	MDR4	2
123	Hi-123	GCA_923276455	26544	Yes	2016	6	Norway	North	Troms	Tromsø	Routine	75-79	Female	Hospital inpatient	No	Sputum	0_1_0_2_3_0_0_2_0_0_0_0_0	66	1521	NTHi	Singleton	1	II	X5	353	X5-353	Not investigated	Not investigated	0	.	.	.	.	.	.	.	.	.	.	.	.	.	3	L	I	N	.	MDR5	0.25
124	Hi-124	GCA_923278555	26545	Yes	2016	6	Norway	Capital	Oslo	Fürst	Routine	35-39	Male	Primary care	No	Upper RT	0_2_0_0_2_0_0_1_7_0_0_1_0	16	422	NTHi	02	3	III-like(+)	3a	26	3a-26	Yes	Yes	0	.	.	.	.	.	.	.	.	.	.	.	.	.	0	.	.	.	.	MDR4	1
125	Hi-125	GCA_923283885	26546	Yes	2016	6	Sweden	Sweden	Kalmar	Kalmar	Routine	70-74	Female	Primary care	No	Upper RT	0_0_0_6_0_1_0_9_30_0_0_0_0	11	836	NTHi	25	3	III-like(+)	3b	26	3b-26	No	No	1	.	.	.	.	100	.	.	.	.	.	.	.	.	0	.	.	.	.	MDR4	1
126	Hi-126	GCA_923277345	26547	Yes	2016	7	Norway	Capital	Oslo	Fürst	Routine	5-9	Female	Primary care	No	Upper RT	0_1_2_0_0_0_1_0_0_0_0_0_0	22	472	NTHi	Singleton	3	III(+)	2a	40	2a-40	No	No	1	.	.	.	.	100	.	.	.	.	.	.	.	.	0	.	.	.	.	MDR4	2
127	Hi-127	GCA_923277065	26548	No (false R)	2016	8	Norway	Capital	Oslo	Fürst	Routine	60-64	Female	Primary care	No	Upper RT	0_0_0_7_7_0_0_0_13_0_10_0_0	10	1034	NTHi	Not performed	1	II	A	1	A-1	Not investigated	Not investigated	0	.	.	.	.	.	.	.	.	.	.	.	.	.	0	.	.	.	.	Not classified	0.25
128	Hi-128	GCA_923277295	26549	No (false R)	2016	8	Norway	South	Buskerud	Vestre Viken	Routine	60-64	Male	Primary care	No	Upper RT	0_0_0_7_7_0_0_0_13_0_0_3_0	10	1034	NTHi	Not performed	1	II	A	1	A-1	Not investigated	Not investigated	0	.	.	.	.	.	.	.	.	.	.	.	.	.	0	.	.	.	.	Not classified	0.25
129	Hi-129	GCA_923282145	26550	Yes	2016	8	Norway	East	Akershus	Ahus	Routine	65-69	Male	Hospital inpatient	No	Sputum	0_1_2_0_0_1_0_2_0_0_0_0_0	22	2343	NTHi	Singleton	1	II	X11	79	X11-79	Not investigated	Not investigated	0	.	.	.	.	.	.	.	.	.	.	.	.	.	0	.	.	.	.	MDR3	0.25
130	Hi-130	GCA_923277005	26551	Yes	2016	9	Sweden	Sweden	Västra Götaland	Skövde	Routine	≥80	Male	Primary care	No	Upper RT	0_1_1_0_0_0_1_0_14_0_0_0_0	15	165	NTHi	Singleton	3	III(+)	2a	40	2a-40	No	No	1	.	.	.	.	100	.	.	.	.	.	.	.	.	0	.	.	.	.	MDR3	1
131	Hi-131	GCA_923276925	26552	No (false R)	2016	9	Norway	East	Akershus	Fürst	Routine	55-59	Female	Primary care	No	Upper RT	0_2_2_0_0_0_0_7_0_0_0_0_0	33	84	NTHi	Not performed	1	II	X1	89	X1-89	Not investigated	Not investigated	0	.	.	.	.	.	.	.	.	.	.	.	.	.	0	.	.	.	.	Not classified	0.25
132	Hi-132	GCA_923277105	26553	Yes	2016	9	Norway	North	Nordland	Tromsø	Routine	70-74	Male	Hospital outpatient	No	Sputum	0_2_0_0_2_0_0_1_6_0_0_0_0	16	422	NTHi	Singleton	3	III(+)	2a	40	2a-40	No	No	0	.	.	.	.	.	.	.	.	.	.	.	.	.	0	.	.	.	.	MDR4	1
133	Hi-133	GCA_923286995	26554	Yes	2016	10	Norway	Capital	Oslo	Fürst	Routine	25-29	Female	Primary care	No	Upper RT	0_0_0_3_2_0_1_0_5_2_0_0_0	14	11	NTHi	16	1	II	X10	354	X10-354	No	No	0	.	.	.	.	.	.	.	.	.	.	.	.	.	0	.	.	.	.	MDR4	0.25
134	Hi-134	GCA_923276805	26555	Yes	2016	10	Norway	East	Innlandet	Innlandet	Routine	30-34	Male	Hospital inpatient	No	Trachea	0_0_0_3_1_1_0_0_0_27_2_0_0	6	103	NTHi	23	3	III-like(+)	3a	26	3a-26	Yes	Yes	1	.	.	.	.	100	.	.	.	.	.	.	.	.	0	.	.	.	.	MDR3	1
135	Hi-135	GCA_923283735	26556	Yes	2016	11	Norway	Capital	Oslo	Fürst	Routine	25-29	Female	Primary care	No	Upper RT	0_0_0_10_2_0_0_0_21_0_0_0_0	20	160	NTHi	09	3	III(+)	2a	40	2a-40	No	No	0	.	.	.	.	.	.	.	.	.	.	.	.	.	0	.	.	.	.	MDR4	1
136	Hi-136	GCA_923277165	26557	No (false R)	2016	10	Norway	Capital	Oslo	Fürst	Routine	35-39	Female	Primary care	No	Upper RT	0_0_0_8_0_0_0_6_10_0_0_0_0	17	2031	NTHi	Not performed	2	III-like(-)	21	32	21-32	Not investigated	Not investigated	0	.	.	.	.	99.52	.	.	.	.	.	.	.	.	0	.	.	.	.	Not classified	0.25
137	Hi-137	GCA_927808805	26558	Yes	2016	11	Norway	East	Innlandet	Innlandet	Routine	50-54	Female	Primary care	No	Upper RT	0_0_0_6_0_1_0_9_26_0_0_0_0	11	836	NTHi	Singleton	3	III-like(+)	3a	26	3a-26	No	No	1	.	.	.	.	100	.	.	.	.	.	.	.	.	0	.	.	.	.	MDR4	1
138	Hi-138	GCA_923283745	26559	No (false R)	2016	11	Norway	East	Akershus	Ahus	Routine	75-79	Female	Hospital inpatient	No	Sputum	0_1_0_1_0_0_1_0_10_0_0_0_0	18	1218	NTHi	Not performed	1	I	X14	97	X14-97	Not investigated	Not investigated	0	.	.	.	.	.	.	.	.	.	.	.	.	.	0	.	.	.	.	Not classified	0.25
140	Hi-140	GCA_923277055	26560	Yes	2016	12	Norway	South	Vestfold	Vestfold	Routine	0-4	Female	Primary care	No	Upper RT	0_0_0_7_5_0_0_0_14_0_2_0_0	54	183	NTHi	01	3	III-like(+)	3b	352	3b-352	No	No	0	.	.	.	.	.	.	.	.	.	.	.	.	.	0	.	.	.	.	MDR3	1
141	Hi-141	GCA_923283715	26561	Yes	2016	11	Norway	East	Akershus	Fürst	Routine	0-4	Male	Primary care	No	Upper RT	0_0_0_10_2_0_0_0_21_0_1_0_0	20	160	NTHi	09	3	III(+)	2a	40	2a-40	No	No	0	.	.	.	.	.	.	.	.	.	.	.	.	.	0	.	.	.	.	MDR4	2
142	Hi-142	GCA_923276935	26562	Yes	2016	11	Norway	Capital	Oslo	Fürst	Routine	40-44	Female	Primary care	No	Upper RT	0_0_0_0_6_0_0_0_7_2_0_2_0	26	143	NTHi	08	3	III-like(+)	3a	107	3a-107	Yes	Yes	3	99.89	100	100	.	100	.	100	100	.	.	.	.	.	0	.	.	.	.	MDR4	2
143	Hi-143	GCA_923283595	26563	Yes	2016	12	Norway	Capital	Oslo	Fürst	Routine	0-4	Male	Primary care	No	Upper RT	0_0_0_0_6_0_0_0_7_2_0_1_0	26	143	NTHi	08	3	III-like(+)	3a	107	3a-107	Yes	Yes	3	99.89	100	100	.	100	.	100	100	.	.	.	.	.	0	.	.	.	.	MDR4	2
144	Hi-144	GCA_923278435	26564	Yes	2017	1	Norway	South	Vestfold	Vestfold	Routine	60-64	Female	Hospital inpatient	No	Upper RT	0_1_0_0_3_0_0_2_0_0_2_0_0	23	155	NTHi	06	2	III-like(-)	4a	33	4a-33	Not investigated	Not investigated	0	.	.	.	.	.	.	.	.	.	.	.	.	.	0	.	.	.	.	MDR3	0.5
145	Hi-145	GCA_923276975	26565	Yes	2017	1	Norway	East	Akershus	Fürst	Routine	55-59	Female	Primary care	No	Upper RT	0_0_0_7_5_0_0_0_14_0_3_0_0	54	183	NTHi	01	3	III-like(+)	3b	352	3b-352	No	No	0	.	.	.	.	.	.	.	.	.	.	.	.	.	0	.	.	.	.	MDR3	2
147	Hi-147	GCA_923277085	26567	Yes	2017	1	Norway	Capital	Oslo	Fürst	Surveillance	30-34	Female	Primary care	No	Upper RT	0_0_0_0_6_0_0_0_7_2_0_1_0	26	143	NTHi	08	3	III-like(+)	3a	107	3a-107	Yes	Yes	3	99.89	100	100	.	100	.	100	100	.	.	.	.	.	0	.	.	.	.	MDR4	2
148	Hi-148	GCA_923277125	26568	Yes	2017	1	Norway	Capital	Oslo	Oslo	Routine	≥80	Female	Hospital inpatient	No	Upper RT	0_1_0_1_1_0_0_3_19_0_1_0_0	7	107	NTHi	04	3	III(+)	2a	40	2a-40	No	No	0	.	.	.	.	.	.	.	.	.	.	.	.	.	0	.	.	.	.	MDR4	1
149	Hi-149	GCA_923277135	26569	Yes	2016	12	Sweden	Sweden	Jönköping	Jönköping	Routine	70-74	Female	Hospital inpatient	Spain/Canary islands	Upper RT	0_1_0_2_3_0_0_2_1_0_0_0_0	66	1521	NTHi	Singleton	3	III-like(+)	3a	26	3a-26	No	No	2	.	.	100	100	100	.	.	.	.	.	.	.	.	3	L	I	N	.	XDR7	2
150	Hi-150	GCA_923276945	26570	Yes	2017	2	Norway	Capital	Oslo	Fürst	Routine	60-64	Female	Primary care	No	Upper RT	0_1_2_0_0_0_0_0_2_2_0_0_0	22	472	NTHi	Singleton	3	III(+)	10	51	10-51	Yes	No	0	.	.	.	.	.	.	.	.	.	.	.	.	.	0	.	.	.	.	MDR3	1
151	Hi-151	GCA_923276955	26571	Yes	2017	2	Norway	East	Akershus	Fürst	Routine	5-9	Male	Primary care	No	Upper RT	0_2_0_0_2_0_0_1_7_0_0_0_0	16	422	NTHi	02	3	III-like(+)	3a	26	3a-26	Yes	Yes	0	.	.	.	.	.	.	.	.	.	.	.	.	.	0	.	.	.	.	MDR4	2
152	Hi-152	GCA_923276755	26572	Yes	2017	2	Norway	Capital	Oslo	Fürst	Routine	65-69	Female	Primary care	No	Upper RT	0_0_0_6_0_1_0_9_31_0_0_0_0	11	836	NTHi	Singleton	3	III-like(+)	3b	26	3b-26	No	No	1	.	.	.	.	100	.	.	.	.	.	.	.	.	0	.	.	.	.	MDR4	2
153	Hi-153	GCA_923276865	26573	Yes	2017	2	Norway	East	Akershus	Ahus	Surveillance	75-79	Female	Hospital inpatient	No	Blood	0_0_0_7_7_0_0_8_1_0_0_0_0	10	2344	NTHi	Singleton	3	III(+)	5	16	5-16	No	No	1	.	.	.	.	100	.	.	.	.	.	.	.	.	0	.	.	.	.	MDR4	1
154	Hi-154	GCA_923281045	26574	Yes	2017	2	Norway	Capital	Oslo	Oslo	Routine	60-64	Female	Hospital outpatient	No	Sputum	0_1_0_2_5_1_1_0_0_0_0_0_0	13	265	NTHi	Singleton	1	II	X3	151	X3-151	Not investigated	Not investigated	0	.	.	.	.	.	.	.	.	.	.	.	.	.	0	.	.	.	.	MDR4	0.25
155	Hi-155	GCA_923286765	26575	Yes	2017	2	Norway	Capital	Oslo	Fürst	Routine	60-64	Female	Primary care	No	Upper RT	0_2_0_0_2_0_0_1_7_0_0_1_0	16	422	NTHi	02	3	III-like(+)	3a	26	3a-26	Yes	Yes	0	.	.	.	.	.	.	.	.	.	.	.	.	.	0	.	.	.	.	MDR4	0.5
156	Hi-156	GCA_923281085	26576	Yes	2017	2	Norway	East	Akershus	Fürst	Routine	35-39	Male	Primary care	No	Upper RT	0_0_0_7_5_0_0_0_14_1_2_0_0	54	183	NTHi	01	3	III-like(+)	3b	352	3b-352	No	No	0	.	.	.	.	.	.	.	.	.	.	.	.	.	0	.	.	.	.	MDR3	1
157	Hi-157	GCA_923280995	26577	Yes	2017	2	Norway	East	Akershus	Fürst	Routine	45-49	Male	Primary care	No	Upper RT	0_1_0_1_0_0_2_0_4_0_1_0_0	18	159	NTHi	15	3	III(+)	2b	40	2b-40	Yes	Yes	0	.	.	.	.	.	.	.	.	.	.	.	.	.	0	.	.	.	.	MDR3	1
158	Hi-158	GCA_923276725	26578	Yes	2017	3	Norway	South	Vestfold	Vestfold	Routine	70-74	Female	Hospital inpatient	Cuba	Upper RT	0_1_0_2_5_1_0_3_1_5_0_0_0	13	388	NTHi	12	3	III-like(+)	3a	26	3a-26	Yes	No	1	.	.	.	.	100	.	.	.	.	.	.	.	.	0	.	.	.	.	MDR3	2
159	Hi-159	GCA_923281005	26579	Yes	2017	3	Norway	East	Akershus	Fürst	Routine	60-64	Female	Primary care	No	Upper RT	0_1_0_1_0_0_2_0_4_0_1_0_0	18	159	NTHi	15	3	III(+)	2b	40	2b-40	Yes	Yes	0	.	.	.	.	.	.	.	.	.	.	.	.	.	0	.	.	.	.	MDR3	0.25
160	Hi-160	GCA_923276915	26580	Yes	2017	4	Norway	East	Akershus	Fürst	Routine	40-44	Female	Primary care	No	Upper RT	0_2_0_0_2_0_0_1_7_0_0_1_0	16	422	NTHi	02	3	III-like(+)	3a	26	3a-26	Yes	Yes	0	.	.	.	.	.	.	.	.	.	.	.	.	.	0	.	.	.	.	MDR4	0.5
161	Hi-161	GCA_923276765	26581	Yes	2017	4	Norway	East	Østfold	Østfold	Routine	70-74	Female	Hospital inpatient	No	Upper RT	0_0_0_7_5_0_0_0_14_1_0_1_0	54	183	NTHi	01	3	III-like(+)	3b	352	3b-352	No	No	0	.	.	.	.	.	.	.	.	.	.	.	.	.	0	.	.	.	.	MDR3	2
162	Hi-162	GCA_923278425	26582	Yes	2017	4	Norway	East	Akershus	Fürst	Routine	65-69	Male	Primary care	No	Upper RT	0_0_0_7_5_0_0_0_14_1_2_0_0	54	183	NTHi	01	3	III-like(+)	3b	352	3b-352	No	No	0	.	.	.	.	.	.	.	.	.	.	.	.	.	0	.	.	.	.	MDR3	1
163	Hi-163	GCA_923276845	26583	Yes	2017	5	Norway	Central	Trøndelag	St. Olav	Routine	50-54	Female	Hospital inpatient	No	Upper RT	0_0_0_7_5_0_0_0_14_1_1_0_0	54	183	NTHi	01	3	III-like(+)	3b	352	3b-352	No	No	0	.	.	.	.	.	.	.	.	.	.	.	.	.	0	.	.	.	.	MDR3	1
164	Hi-164	GCA_923278415	26584	Yes	2017	5	Norway	East	Innlandet	Innlandet	Routine	0-4	Female	Hospital inpatient	No	Upper RT	0_0_0_5_2_0_0_1_0_8_0_0_0	95	1	NTHi	03	3	III(+)	8	19	8-19	Yes	Yes	0	.	.	.	.	.	.	.	.	.	.	.	.	.	2	L	I	.	.	MDR5	0.5
165	Hi-165	GCA_923276905	26585	No (false R)	2017	6	Norway	Central	Trøndelag	St. Olav	Routine	≥80	Female	Hospital inpatient	No	Sputum	0_0_0_7_7_0_0_0_7_0_0_0_0	10	14	NTHi	Not performed	1	II	A	1	A-1	Not investigated	Not investigated	0	.	.	.	.	.	.	.	.	.	.	.	.	.	0	.	.	.	.	Not classified	0.25
166	Hi-166	GCA_923276995	26586	Yes	2017	7	Norway	Central	Trøndelag	Levanger	Routine	≥80	Male	Hospital inpatient	No	Sputum	0_1_0_1_0_0_1_0_8_0_0_0_0	18	1218	NTHi	Singleton	3	III(+)	2a	40	2a-40	No	No	0	.	.	.	.	.	.	.	.	.	.	.	.	.	0	.	.	.	.	MDR4	1
167	Hi-167	GCA_923286705	26587	Yes	2017	7	Norway	Central	Trøndelag	St. Olav	Routine	65-69	Male	Hospital inpatient	No	Trachea	0_0_0_0_6_0_0_0_1_6_0_0_0	26	143	NTHi	Singleton	3	III(+)	14	16	14-16	Yes	No	0	.	.	.	.	.	.	.	.	.	.	.	.	.	0	.	.	.	.	MDR3	1
168	Hi-168	GCA_923276695	26588	Yes	2017	7	Norway	Central	Trøndelag	St. Olav	Routine	50-54	Male	Hospital inpatient	No	Trachea	0_1_0_2_3_0_0_1_0_1_1_0_0	66	196	NTHi	07	3	III(+)	2b	218	2b-218	Yes	No	0	.	.	.	.	.	.	.	.	.	.	.	.	.	0	.	.	.	.	MDR3	1
169	Hi-169	GCA_923280895	26589	Yes	2017	7	Norway	Capital	Oslo	Oslo	Routine	20-24	Female	Hospital inpatient	No	Upper RT	0_1_0_1_0_0_1_0_11_0_0_0_0	18	1218	NTHi	Singleton	3	III(+)	5	16	5-16	No	No	0	.	.	.	.	.	.	.	.	.	.	.	.	.	0	.	.	.	.	MDR4	1
170	Hi-170	GCA_923280915	26590	Yes	2017	7	Norway	East	Innlandet	Innlandet	Routine	70-74	Male	Primary care	No	Upper RT	0_0_0_3_2_0_1_0_5_1_0_0_0	14	11	NTHi	16	3	III-like(+)	3a	26	3a-26	No	No	0	.	.	.	.	.	.	.	.	.	.	.	.	.	0	.	.	.	.	MDR4	2
171	Hi-171	GCA_923278405	26591	Yes	2017	8	Norway	East	Akershus	Fürst	Routine	55-59	Male	Primary care	No	Upper RT	0_1_0_2_5_1_0_3_1_4_0_0_0	13	388	NTHi	12	3	III-like(+)	18	78	18-78	Yes	No	1	.	.	.	.	100	.	.	.	.	.	.	.	.	0	.	.	.	.	MDR3	2
172	Hi-172	GCA_923276965	26592	Yes	2017	8	Norway	East	Innlandet	Fürst	Routine	0-4	Male	Primary care	No	Upper RT	0_0_0_7_5_0_0_3_0_0_0_0_0	54	183	NTHi	Singleton	3	III-like(+)	3a	26	3a-26	No	No	1	.	.	.	.	99.88	.	.	.	.	.	.	.	.	1	L	.	.	.	MDR5	1
173	Hi-173	GCA_923276775	26593	Yes	2017	8	Norway	West	Rogaland	Haugesund	Routine	35-39	Female	Hospital inpatient	No	Lower RT	0_1_0_2_5_0_0_2_0_0_1_0_0	13	1197	NTHi	05	2	III(-)	1	342	1-342	Not investigated	Not investigated	0	.	.	.	.	.	.	.	.	.	.	.	.	.	0	.	.	.	.	MDR3	0.25
174	Hi-174	GCA_923276815	26594	Yes	2017	8	Norway	Capital	Oslo	Fürst	Routine	35-39	Female	Primary care	No	Upper RT	0_0_0_7_6_0_0_0_1_0_0_0_0	163	1494	NTHi	Singleton	3	III(+)	11a	355	11a-355	No	No	4	.	.	.	.	100	.	100	100	.	.	.	.	.	1	L	.	.	.	MDR5	1
175	Hi-175	GCA_923276605	26595	Yes	2017	8	Norway	East	Innlandet	Fürst	Routine	35-39	Male	Primary care	No	Upper RT	0_4_0_12_0_1_0_1_0_0_0_0_0	62	208	NTHi	Singleton	3	III(+)	13	356	13-356	No	No	0	.	.	.	.	.	.	.	.	.	.	.	.	.	0	.	.	.	.	MDR3	0.5
176	Hi-176	GCA_923286595	26596	Yes	2017	9	Norway	Capital	Oslo	Fürst	Routine	45-49	Male	Primary care	No	Upper RT	0_0_0_6_0_1_0_9_25_0_1_0_0	11	836	NTHi	Singleton	3	III-like(+)	3a	26	3a-26	Yes	Yes	1	.	.	.	.	100	.	.	.	.	.	.	.	.	1	L	.	.	.	MDR5	2
177	Hi-177	GCA_923278395	26597	Yes	2017	9	Norway	Capital	Oslo	Fürst	Routine	55-59	Female	Primary care	No	Upper RT	0_0_0_5_2_0_0_1_0_1_0_0_0	95	1	NTHi	03	3	III(+)	8	19	8-19	Yes	Yes	0	.	.	.	.	.	.	.	.	.	.	.	.	.	2	L	I	.	.	MDR5	0.5
178	Hi-178	GCA_923276465	26598	Yes	2017	9	Norway	Capital	Oslo	Fürst	Routine	60-64	Female	Primary care	No	Upper RT	0_0_0_5_2_0_0_1_0_1_0_0_0	95	1	NTHi	03	3	III(+)	8	19	8-19	Yes	Yes	0	.	.	.	.	.	.	.	.	.	.	.	.	.	2	L	I	.	.	MDR5	0.5
179	Hi-179	GCA_923283495	26599	Yes	2017	10	Norway	South	Vestfold	Vestfold	Routine	≥80	Male	Primary care	No	Sputum	0_0_0_7_5_0_0_0_14_0_3_2_0	54	183	NTHi	01	3	III-like(+)	3b	352	3b-352	No	No	0	.	.	.	.	.	.	.	.	.	.	.	.	.	0	.	.	.	.	MDR3	1
180	Hi-180	GCA_923276515	26600	Yes	2017	10	Norway	South	Vestfold	Vestfold	Routine	0-4	Female	Hospital inpatient	No	Upper RT	0_0_0_7_5_0_0_0_14_0_3_0_0	54	183	NTHi	01	3	III-like(+)	3b	352	3b-352	No	No	0	.	.	.	.	.	.	.	.	.	.	.	.	.	0	.	.	.	.	MDR3	2
181	Hi-181	GCA_923277025	26601	Yes	2017	10	Norway	Capital	Oslo	Fürst	Routine	60-64	Female	Primary care	No	Upper RT	0_0_0_7_3_0_0_0_14_0_0_0_0	5	12	NTHi	Singleton	3	III-like(+)	3a	26	3a-26	No	No	0	.	.	.	.	.	.	.	.	.	.	.	.	.	0	.	.	.	.	MDR3	2
182	Hi-182	GCA_923276735	26602	Yes	2017	10	Norway	Capital	Oslo	Fürst	Routine	40-44	Female	Primary care	No	Upper RT	0_0_0_6_0_1_0_9_46_0_0_0_0	11	836	NTHi	Singleton	2	III-like(-)	4a	33	4a-33	Not investigated	Not investigated	1	.	.	.	.	100	.	.	.	.	.	.	.	.	0	.	.	.	.	MDR4	0.25
183	Hi-183	GCA_923283345	26603	Yes	2017	10	Norway	South	Agder	Sørlandet	Routine	55-59	Male	Hospital inpatient	No	Sputum	0_0_0_7_5_0_0_0_14_0_4_0_0	54	183	NTHi	01	3	III-like(+)	3b	352	3b-352	No	No	0	.	.	.	.	.	.	.	.	.	.	.	.	.	0	.	.	.	.	MDR3	1
184	Hi-184	GCA_923280575	26604	No (false R)	2017	11	Norway	South	Agder	Sørlandet	Routine	70-74	Female	Hospital inpatient	No	Blood	0_0_0_7_7_0_0_0_13_6_0_0_0	10	1034	NTHi	Not performed	1	II	A	1	A-1	Not investigated	Not investigated	0	.	.	.	.	.	.	.	.	.	.	.	.	.	0	.	.	.	.	Not classified	0.25
185	Hi-185	GCA_923277115	26605	Yes	2017	11	Norway	Capital	Oslo	Oslo	Routine	40-44	Male	Hospital inpatient	No	Trachea	0_2_0_0_2_0_0_1_7_0_0_2_0	16	422	NTHi	02	3	III-like(+)	3a	26	3a-26	Yes	Yes	0	.	.	.	.	.	.	.	.	.	.	.	.	.	0	.	.	.	.	MDR4	2
186	Hi-186	GCA_923283415	26606	Yes	2017	11	Norway	East	Akershus	Ahus	Routine	60-64	Female	Hospital inpatient	No	Lower RT	0_0_0_5_2_0_0_1_0_1_1_0_0	95	1	NTHi	03	3	III(+)	8	19	8-19	Yes	Yes	0	.	.	.	.	.	.	.	.	.	.	.	.	.	2	L	I	.	.	MDR5	0.5
187	Hi-187	GCA_923286135	26607	Yes	2017	11	Norway	Capital	Oslo	Fürst	Routine	25-29	Male	Primary care	No	Upper RT	0_0_0_5_2_0_0_1_0_1_0_0_0	95	1	NTHi	03	3	III(+)	8	19	8-19	Yes	Yes	0	.	.	.	.	.	.	.	.	.	.	.	.	.	2	L	I	.	.	MDR5	0.5
188	Hi-188	GCA_923302885	26608	Yes	2017	11	Norway	East	Østfold	Østfold	Routine	≥80	Female	Hospital inpatient	No	Sputum	0_0_0_10_2_0_0_0_21_0_0_1_0	20	160	NTHi	09	3	III(+)	2a	40	2a-40	No	No	0	.	.	.	.	.	.	.	.	.	.	.	.	.	0	.	.	.	.	MDR4	2
189	Hi-189	GCA_923277015	26609	Yes	2017	12	Norway	East	Akershus	Fürst	Routine	0-4	Female	Primary care	No	Upper RT	0_0_0_10_2_0_0_0_21_0_0_2_0	20	160	NTHi	09	3	III(+)	2a	40	2a-40	No	No	0	.	.	.	.	.	.	.	.	.	.	.	.	.	0	.	.	.	.	MDR4	2
190	Hi-190	GCA_923276655	26610	Yes	2017	12	Norway	Capital	Oslo	Fürst	Routine	70-74	Female	Primary care	No	Upper RT	0_1_0_0_3_0_0_0_7_0_0_1_0	23	155	NTHi	Singleton	3	III(+)	5	16	5-16	Yes	Yes	1	.	.	.	.	100	.	.	.	.	.	.	.	.	0	.	.	.	.	MDR4	1
191	Hi-191	GCA_923276985	26611	Yes	2017	12	Norway	West	Vestland	Haukeland	Routine	35-39	Female	Hospital outpatient	No	Sputum	0_1_0_1_1_0_0_3_31_0_0_0_0	7	107	NTHi	Singleton	3	III(+)	8	22	8-22	No	No	4	.	.	.	.	100	.	100	100	.	.	.	.	.	0	.	.	.	.	MDR4	1
192	Hi-192	GCA_923286075	26612	Yes	2017	12	Norway	West	Vestland	Haukeland	Routine	50-54	Female	Primary care	No	Sputum	1_0_0_5_4_0_0_0_12_0_0_0_0	53	567	NTHi	Singleton	3	III(+)	11b	357	11b-357	No	No	0	.	.	.	.	.	.	.	.	.	.	.	.	.	0	.	.	.	.	MDR4	0.5
193	Hi-193	GCA_923277035	26613	Yes	2017	12	Norway	South	Buskerud	Vestre Viken	Routine	0-4	Male	Hospital inpatient	No	Upper RT	0_0_0_7_5_0_0_0_14_1_0_0_0	54	183	NTHi	01	3	III-like(+)	3b	352	3b-352	No	No	0	.	.	.	.	.	.	.	.	.	.	.	.	.	0	.	.	.	.	MDR3	2
194	Hi-194	GCA_923279005	26614	Yes	2017	12	Norway	Capital	Oslo	Fürst	Routine	25-29	Female	Primary care	No	Upper RT	0_1_0_2_5_1_0_3_1_6_0_0_0	13	388	NTHi	12	3	III(+)	15	358	15-358	Yes	No	1	.	.	.	.	100	.	.	.	.	.	.	.	.	0	.	.	.	.	MDR3	0.5
195	Hi-195	GCA_923282575	26615	Yes	2017	12	Norway	Capital	Oslo	Oslo	Routine	0-4	Female	Hospital inpatient	No	Trachea	0_0_0_7_5_0_0_0_14_0_3_0_0	54	183	NTHi	01	3	III-like(+)	3b	352	3b-352	No	No	0	.	.	.	.	.	.	.	.	.	.	.	.	.	0	.	.	.	.	MDR3	1
196	Hi-196	GCA_923283395	26616	Yes	2017	12	Norway	East	Innlandet	Innlandet	Routine	≥80	Male	Hospital inpatient	No	Upper RT	0_1_0_1_1_0_0_3_19_0_0_0_0	7	2385	NTHi	04	3	III(+)	2a	40	2a-40	No	No	0	.	.	.	.	.	.	.	.	.	.	.	.	.	0	.	.	.	.	MDR4	2
198	Hi-198	GCA_923286435	26618	Yes	2018	1	Norway	West	Rogaland	Stavanger	Routine	65-69	Male	Hospital outpatient	No	No data	0_1_0_1_0_0_2_0_4_1_0_0_0	18	159	NTHi	15	3	III(+)	2b	40	2b-40	Yes	Yes	0	.	.	.	.	.	.	.	.	.	.	.	.	.	0	.	.	.	.	MDR3	1
199	Hi-199	GCA_923276885	26619	No (false R)	2018	1	Norway	South	Vestfold	Vestfold	Routine	70-74	Male	Hospital inpatient	No	Upper RT	0_0_0_7_7_0_0_0_10_0_10_0_0	10	14	NTHi	Not performed	1	II	A	1	A-1	Not investigated	Not investigated	0	.	.	.	.	.	.	.	.	.	.	.	.	.	0	.	.	.	.	Not classified	0.25
200	Hi-200	GCA_923286405	26620	Yes	2018	1	Norway	Capital	Oslo	Fürst	Routine	5-9	Male	Primary care	No	Upper RT	0_2_4_0_2_0_0_13_0_0_0_0_0	9	57	NTHi	Singleton	3	III(+)	8	19	8-19	No	No	7	.	.	100	100	.	.	.	.	.	.	.	.	.	3	L	R	Y	.	XDR8	0.5
201	Hi-201	GCA_923280495	26621	Yes	2018	1	Norway	Capital	Oslo	Fürst	Routine	65-69	Female	Primary care	No	Upper RT	0_0_0_6_0_1_0_9_6_0_1_0_0	11	836	NTHi	17	2	III-like(-)	4b	33	4b-33	Not investigated	Not investigated	0	.	.	.	.	.	.	.	.	.	.	.	.	.	0	.	.	.	.	MDR3	0.25
202	Hi-202	GCA_923282975	26622	Yes	2018	1	Norway	Capital	Oslo	Fürst	Routine	75-79	Male	Primary care	No	Upper RT	0_2_4_0_2_0_0_5_16_0_0_0_0	9	57	NTHi	Singleton	3	III(+)	10	359	10-359	No	No	0	.	.	.	.	.	.	.	.	.	.	.	.	.	0	.	.	.	.	MDR5	1
203	Hi-203	GCA_923268265	26623	Yes	2018	1	Norway	Central	Trøndelag	Levanger	Routine	55-59	Male	Hospital inpatient	No	Sputum	0_0_0_7_5_0_0_0_14_0_3_0_0	54	183	NTHi	01	3	III-like(+)	3b	352	3b-352	No	No	0	.	.	.	.	.	.	.	.	.	.	.	.	.	0	.	.	.	.	MDR3	2
204	Hi-204	GCA_923302955	26624	Yes	2018	2	Norway	West	Vestland	Haukeland	Routine	0-4	Female	Hospital inpatient	No	Upper RT	0_1_0_1_1_0_0_3_19_0_0_1_0	7	2385	NTHi	04	3	III(+)	2a	40	2a-40	No	No	0	.	.	.	.	.	.	.	.	.	.	.	.	.	0	.	.	.	.	MDR4	2
205	Hi-205	GCA_923286195	26625	Yes	2018	2	Norway	East	Innlandet	St. Olav	Routine	70-74	Male	Hospital inpatient	No	Trachea	33_1_0_0_0_0_0_0_0_0_0_0_0	Novel4	2345	NTHi	Singleton	3	III(+)	2b	40	2b-40	No	No	0	.	.	.	.	.	.	.	.	.	.	.	.	.	0	.	.	.	.	MDR3	2
206	Hi-206	GCA_923278115	26626	Yes	2018	2	Norway	Capital	Oslo	Oslo	Routine	70-74	Female	Hospital inpatient	No	Upper RT	No data	7	1556	NTHi	Singleton	3	III-like(+)	16b	194	16b-194	Not applicable	Not applicable	4	.	.	.	.	100	.	99.92	100	.	.	.	.	.	1	L	.	.	.	MDR5	2
207	Hi-207	GCA_923282885	26627	Yes	2018	2	Norway	Capital	Oslo	Fürst	Routine	0-4	Female	Primary care	No	Upper RT	0_0_0_10_2_0_0_0_22_0_0_0_0	20	160	NTHi	Singleton	1	II	X8	360	X8-360	Not investigated	Not investigated	0	.	.	.	.	.	.	.	.	.	.	.	.	.	0	.	.	.	.	MDR3	0.25
208	Hi-208	GCA_923268185	26628	Yes	2018	2	Norway	East	Innlandet	Innlandet	Routine	0-4	Female	Primary care	No	Eye	0_1_0_1_1_0_0_3_16_0_0_0_0	7	107	NTHi	Singleton	3	III(+)	8	22	8-22	No	No	0	.	.	.	.	.	.	.	.	.	.	.	.	.	0	.	.	.	.	MDR4	0.5
209	Hi-209	GCA_923282525	26629	Yes	2018	3	Norway	East	Akershus	Ahus	Routine	70-74	Male	Hospital inpatient	No	Lower RT	0_2_0_0_2_0_0_1_8_0_0_0_0	16	422	NTHi	Singleton	3	III-like(+)	3a	26	3a-26	No	No	0	.	.	.	.	.	.	.	.	.	.	.	.	.	0	.	.	.	.	MDR4	2
210	Hi-210	GCA_923279985	26630	Yes	2018	3	Norway	South	Vestfold	Vestfold	Routine	55-59	Female	Hospital inpatient	No	Trachea	0_0_0_7_5_0_0_0_14_0_3_3_0	54	183	NTHi	01	3	III-like(+)	3b	352	3b-352	No	No	0	.	.	.	.	.	.	.	.	.	.	.	.	.	0	.	.	.	.	MDR2	2
211	Hi-211	GCA_923278785	26631	Yes	2018	3	Norway	Capital	Oslo	Oslo	Routine	70-74	Male	Hospital inpatient	No	Trachea	0_2_0_0_2_0_0_1_7_1_0_0_0	16	422	NTHi	02	3	III-like(+)	3a	26	3a-26	Yes	Yes	0	.	.	.	.	.	.	.	.	.	.	.	.	.	0	.	.	.	.	MDR4	2
212	Hi-212	GCA_923285925	26632	Yes	2018	3	Norway	West	Vestland	Haukeland	Routine	40-44	Male	Hospital outpatient	No	Upper RT	0_1_0_1_0_0_2_0_3_0_0_0_0	18	159	NTHi	Singleton	3	III(+)	5	16	5-16	No	No	0	.	.	.	.	.	.	.	.	.	.	.	.	.	0	.	.	.	.	MDR3	1
213	Hi-213	GCA_923279965	26633	Yes	2018	5	Norway	Capital	Oslo	Oslo	Routine	70-74	Male	Hospital inpatient	No	Upper RT	0_0_0_5_2_0_0_1_0_6_0_0_0	95	1	NTHi	03	3	III(+)	8	19	8-19	Yes	Yes	0	.	.	.	.	.	.	.	.	.	.	.	.	.	2	L	I	.	.	MDR5	0.5
214	Hi-214	GCA_923278015	26634	Yes	2018	5	Norway	East	Akershus	Vestre Viken	Routine	15-19	Male	Hospital inpatient	No	Upper RT	0_0_0_7_1_4_0_0_0_0_0_0_0	5	3	NTHi	Singleton	3	III-like(+)	3a	26	3a-26	No	No	0	.	.	.	.	.	.	.	.	.	.	.	.	.	0	.	.	.	.	MDR4	1
221	Hi-221	GCA_923304245	26638	Yes	2015	4	Norway	West	Rogaland	Stavanger	Surveillance	45-49	Female	Hospital inpatient	No	Blood	0_4_1_0_2_0_0_0_0_0_0_0_0	Novel5	1221	NTHi	Singleton	3	III-like(+)	3a	26	3a-26	No	No	2	.	.	100	100	100	.	.	.	.	.	.	.	.	0	.	.	.	.	MDR6	1
224	Hi-224	GCA_923282795	26639	Yes	2017	2	Norway	South	Vestfold	Vestfold	Surveillance	70-74	Male	Hospital inpatient	No	Lower RT	0_1_0_0_3_0_0_2_0_0_1_0_0	23	155	NTHi	06	2	III-like(-)	4a	33	4a-33	Not investigated	Not investigated	0	.	.	.	.	.	.	.	.	.	.	.	.	.	0	.	.	.	.	MDR3	0.25
227	Hi-227	GCA_923279875	26641	Yes	2017	1	Norway	East	Akershus	Fürst	Surveillance	5-9	Male	Primary care	No	Upper RT	0_2_0_0_2_0_0_1_7_0_0_3_0	16	422	NTHi	02	3	III-like(+)	3a	26	3a-26	Yes	Yes	0	.	.	.	.	.	.	.	.	.	.	.	.	.	0	.	.	.	.	MDR4	2
228	Hi-228	GCA_923279895	26642	Yes	2017	1	Norway	Capital	Oslo	Fürst	Surveillance	0-4	Male	Primary care	No	Upper RT	0_0_0_0_6_0_0_0_7_2_0_0_0	26	143	NTHi	08	3	III-like(+)	3a	107	3a-107	Yes	Yes	3	99.89	100	100	.	100	.	100	100	.	.	.	.	.	0	.	.	.	.	MDR4	2
229	Hi-229	GCA_923282205	26643	Yes	2018	9	Norway	South	Vestfold	Vestfold	Routine	≥80	Female	Hospital inpatient	No	Upper RT	0_0_0_7_5_0_0_0_14_0_3_1_0	54	183	NTHi	01	3	III-like(+)	3b	352	3b-352	No	No	0	.	.	.	.	.	.	.	.	.	.	.	.	.	0	.	.	.	.	MDR3	4
230	Hi-230	GCA_923276575	26644	Yes	2018	10	Norway	Central	Trøndelag	St. Olav	Routine	75-79	Female	Hospital inpatient	No	Lower RT	0_0_0_7_7_0_0_8_2_0_0_0_0	10	14	NTHi	Singleton	3	III(+)	5	16	5-16	No	No	1	.	.	.	.	100	.	.	.	.	.	.	.	.	0	.	.	.	.	MDR4	1
231	Hi-231	GCA_923282435	26645	Yes	2014	3	Norway	West	Rogaland	Haugesund	Routine	30-34	Female	Hospital outpatient	No	Upper RT	0_2_2_0_0_0_0_4_0_0_0_0_0	33	84	NTHi	Singleton	3	III-like(+)	3c	26	3c-26	No	No	0	.	.	.	.	.	.	.	.	.	.	.	.	.	0	.	.	.	.	MDR4	2
[truncated: 31 more columns]
